# Supplementary material for: Bacteria in clouds biodegrade atmospheric formic and acetic acids
Source: Copernicus journal article supplement (doi:10.5194/egusphere-2023-2270), 2023-11-09
Supplement: Supplementary file 1 [file egusphere-2023-2270-supplement.pdf]

# Supplement of

## Bacteria in clouds biodegrade atmospheric formic and acetic acids

Leslie Nuñez López, Pierre Amato, and Barbara Ervens

Correspondence to: Barbara Ervens [barbara.ervens@uca.fr](mailto:barbara.ervens@uca.fr)

**Table S1.** Irreversible processes in the aqueous phase. The kinetic data are the same as used in the model study by Khaled et al. (2021). The biodegradation rate constants are calculated based on the lab data by Vaitilingom et al. (2011).

| Chemical reactions |                                                                                |                                                                        |                                                           |                       |
|--------------------|--------------------------------------------------------------------------------|------------------------------------------------------------------------|-----------------------------------------------------------|-----------------------|
|                    | Reactants                                                                      | Products                                                               | k [M <sup>-1</sup> s <sup>-1</sup> ]                      | E <sub>a</sub> /R [K] |
| R1                 | SO <sub>2</sub> + O <sub>3</sub>                                               | → S(VI) + O <sub>2</sub>                                               | 2.4·10 <sup>4</sup>                                       |                       |
| R2                 | HSO <sub>3</sub> <sup>-</sup> + O <sub>3</sub>                                 | → S(VI) + O <sub>2</sub>                                               | 3.7·10 <sup>5</sup>                                       | 5530                  |
| R3                 | SO <sub>3</sub> <sup>2-</sup> + O <sub>3</sub>                                 | → S(VI) + O <sub>2</sub>                                               | 1.5·10 <sup>9</sup>                                       | 5280                  |
| R4                 | H <sub>2</sub> O <sub>2</sub> + HSO <sub>3</sub> <sup>-</sup> + H <sup>+</sup> | → S(VI) + H <sub>2</sub> O                                             | 7.2·10 <sup>7</sup> M <sup>-2</sup> s <sup>-1</sup>       | 4000                  |
| R5                 | HO <sub>2</sub> + HO <sub>2</sub>                                              | → H <sub>2</sub> O <sub>2</sub> + O <sub>2</sub>                       | 8.3·10 <sup>5</sup>                                       | 2720                  |
| R6                 | O <sub>2</sub> <sup>-</sup> + HO <sub>2</sub>                                  | → H <sub>2</sub> O <sub>2</sub> + O <sub>2</sub>                       | 9.7·10 <sup>7</sup>                                       | 1060                  |
| R7                 | OH + CH <sub>2</sub> (OH) <sub>2</sub>                                         | → HO <sub>2</sub> + HCOOH                                              | 1·10 <sup>9</sup>                                         | 1000                  |
| R8                 | OH + CH <sub>3</sub> OOH                                                       | → CH <sub>3</sub> O <sub>2</sub> + H <sub>2</sub> O                    | 2.4·10 <sup>7</sup>                                       | 1680                  |
| R9                 | OH + CH <sub>3</sub> OOH                                                       | → HO <sub>2</sub> + HCOOH                                              | 61·10 <sup>6</sup>                                        | 1680                  |
| R10                | O <sub>3</sub> + O <sub>2</sub> <sup>-</sup> (+ H <sup>+</sup> )               | → OH + 2 O <sub>2</sub>                                                | 1.5·10 <sup>9</sup>                                       | 2200                  |
| R11                | OH + CHOCHO                                                                    | → HO <sub>2</sub> + CHOCOHO                                            | 1.1·10 <sup>9</sup>                                       | 1516                  |
| R12                | OH + CHOCOHO                                                                   | → HO <sub>2</sub> + H <sub>2</sub> C <sub>2</sub> O <sub>4</sub>       | 3.6·10 <sup>8</sup>                                       | 1000                  |
| R13                | OH + CHOCOHO <sup>-</sup>                                                      | → HO <sub>2</sub> + H <sub>2</sub> C <sub>2</sub> O <sub>4</sub>       | 2.9·10 <sup>9</sup>                                       | 4300                  |
| R14                | OH + C <sub>2</sub> O <sub>4</sub> <sup>2-</sup>                               | → O <sub>2</sub> <sup>-</sup> + 2 CO <sub>2</sub> + OH <sup>-</sup>    | 1.6·10 <sup>8</sup>                                       | 4300                  |
| R15                | OH + HC <sub>2</sub> O <sub>4</sub> <sup>-</sup>                               | → HO <sub>2</sub> + 2 CO <sub>2</sub> + OH <sup>-</sup>                | 1.9·10 <sup>8</sup>                                       | 2800                  |
| R16                | OH + H <sub>2</sub> C <sub>2</sub> O <sub>4</sub>                              | → HO <sub>2</sub> + 2 CO <sub>2</sub> + H <sub>2</sub> O               | 1.4·10 <sup>6</sup>                                       |                       |
| R17                | OH + CH <sub>3</sub> C(O)COO <sup>-</sup>                                      | → HO <sub>2</sub> + CO <sub>2</sub> + CH <sub>3</sub> COO <sup>-</sup> | 7.2·10 <sup>8</sup>                                       |                       |
| R18                | OH + CH <sub>3</sub> C(O)COOH                                                  | → HO <sub>2</sub> + H <sub>2</sub> O + CH <sub>3</sub> COOH            | 1.2·10 <sup>8</sup>                                       |                       |
| R19                | OH + CH <sub>3</sub> CHO                                                       | → HO <sub>2</sub> + CO <sub>2</sub> + CH <sub>3</sub> COOH             | 3.6·10 <sup>9</sup>                                       |                       |
| R20                | OH + CH <sub>3</sub> C(O)CHO                                                   | → HO <sub>2</sub> + CHC(O)COOH                                         | 1.1·10 <sup>9</sup>                                       | 1516                  |
| R21                | OH + HCOO <sup>-</sup>                                                         | → HO <sub>2</sub> + CO <sub>2</sub> + H <sub>2</sub> O                 | 3.2·10 <sup>9</sup>                                       | 1000                  |
| R22                | OH + HCOOH                                                                     | → HO <sub>2</sub> + CO <sub>2</sub> + H <sub>2</sub> O                 | 1.3·10 <sup>8</sup>                                       | 1000                  |
| R23                | CH <sub>3</sub> O <sub>2</sub> + CH <sub>3</sub> O <sub>2</sub>                | → CH <sub>2</sub> O + CH <sub>3</sub> OH + HO <sub>2</sub>             | 1.7·10 <sup>8</sup>                                       | 2200                  |
| R24                | H <sub>2</sub> O <sub>2</sub> + OH                                             | → HO <sub>2</sub> + H <sub>2</sub> O                                   | 3·10 <sup>7</sup>                                         | 1680                  |
| R25                | OH + WSOC                                                                      | → WSOC + HO <sub>2</sub>                                               | 3.8·10 <sup>8</sup>                                       |                       |
| R26                | OH + CH <sub>2</sub> OHCHO                                                     | → CH <sub>2</sub> OHCOOH + HO <sub>2</sub>                             | 1.2·10 <sup>9</sup>                                       |                       |
| R27                | OH + CH <sub>2</sub> OHCOOH                                                    | → CHOCOHO + HO <sub>2</sub>                                            | 5.4·10 <sup>8</sup>                                       |                       |
| R28                | OH + CH <sub>2</sub> OHCOO <sup>-</sup>                                        | → CHOCOHO + HO <sub>2</sub>                                            | 1.2·10 <sup>9</sup>                                       |                       |
| R29                | OH + CH <sub>3</sub> COOH                                                      | → 0.85 CHOCOHO + 0.15 HCHO + HO <sub>2</sub>                           | 1.5·10 <sup>7</sup>                                       | 1330                  |
| R30                | OH + CH <sub>3</sub> COO <sup>-</sup>                                          | → 0.85 CHOCOHO + 0.15 HCHO + HO <sub>2</sub>                           | 1·10 <sup>8</sup>                                         | 1800                  |
| R31                | CH <sub>3</sub> (O)O <sub>2</sub> + O <sub>2</sub> <sup>-</sup>                | → CH <sub>3</sub> COOH                                                 | 1·10 <sup>9</sup>                                         |                       |
| R32                | CH <sub>3</sub> (O)O <sub>2</sub> + CH <sub>3</sub> (O)O <sub>2</sub>          | → 2 CH <sub>3</sub> O <sub>2</sub>                                     | 1.5·10 <sup>8</sup>                                       |                       |
| Biodegradation     |                                                                                |                                                                        | k <sub>bact</sub> [L cell <sup>-1</sup> s <sup>-1</sup> ] |                       |
| R33                | HCOOH/HCOO <sup>-</sup> + Bacteria                                             | → Products                                                             | 1.5·10 <sup>-13</sup>                                     |                       |
| R34                | CH <sub>3</sub> COOH/CH <sub>3</sub> COO <sup>-</sup> + Bacteria               | → Products                                                             | 8.7·10 <sup>-14</sup>                                     |                       |

**Table S2.** Aqueous phase equilibria. The data are the same as used in the model study by Khaled et al. (2021).

|     |                                              |                      |                                                              | $K_a$ [M]             |
|-----|----------------------------------------------|----------------------|--------------------------------------------------------------|-----------------------|
| E1  | H <sub>2</sub> O                             | $\rightleftharpoons$ | OH <sup>-</sup> +H <sup>+</sup>                              | 1.0·10 <sup>-14</sup> |
| E2  | HO <sub>2</sub>                              | $\rightleftharpoons$ | O <sub>2</sub> <sup>-</sup> + H <sup>+</sup>                 | 1.60·10 <sup>-5</sup> |
| E3  | CHOCOOH                                      | $\rightleftharpoons$ | CHOCOO <sup>-</sup> + H <sup>+</sup>                         | 6.60·10 <sup>-4</sup> |
| E4  | HCOOH                                        | $\rightleftharpoons$ | HCOO <sup>-</sup> + H <sup>+</sup>                           | 1.77·10 <sup>-4</sup> |
| E5  | H <sub>2</sub> C <sub>2</sub> O <sub>4</sub> | $\rightleftharpoons$ | HC <sub>2</sub> O <sub>4</sub> <sup>-</sup> + H <sup>+</sup> | 6.40·10 <sup>-2</sup> |
| E6  | HC <sub>2</sub> O <sub>4</sub> <sup>-</sup>  | $\rightleftharpoons$ | C <sub>2</sub> O <sub>4</sub> <sup>2-</sup> + H <sup>+</sup> | 5.25·10 <sup>-5</sup> |
| E7  | HNO <sub>3</sub>                             | $\rightleftharpoons$ | NO <sub>3</sub> <sup>-</sup> + H <sup>+</sup>                | 22                    |
| E8  | SO <sub>2</sub> ·H <sub>2</sub> O            | $\rightleftharpoons$ | HSO <sub>3</sub> <sup>-</sup> + H <sup>+</sup>               | 0.013                 |
| E9  | HSO <sub>3</sub> <sup>-</sup>                | $\rightleftharpoons$ | SO <sub>3</sub> <sup>2-</sup> + H <sup>+</sup>               | 6.60·10 <sup>-8</sup> |
| E10 | H <sub>2</sub> SO <sub>4</sub>               | $\rightleftharpoons$ | HSO <sub>4</sub> <sup>-</sup> + H <sup>+</sup>               | 1000                  |
| E11 | HSO <sub>4</sub> <sup>-</sup>                | $\rightleftharpoons$ | SO <sub>4</sub> <sup>2-</sup> + H <sup>+</sup>               | 0.102                 |
| E12 | NH <sub>3</sub>                              | $\rightleftharpoons$ | NH <sub>4</sub> <sup>+</sup> + OH <sup>-</sup>               | 1.76·10 <sup>-5</sup> |

**Table S3.** Phase transfer parameters. The parameters are the same as used in the model study by Khaled et al. (2021). The Henry's law constant for acetic acid is the same as used by Brimblecombe and Clegg (1988), its  $\alpha$  and  $D_g$  values are estimated to be same as for similar compounds.

| Species                        | $M_g$<br>[g mol <sup>-1</sup> ] | $\alpha$ | $D_g$<br>[cm <sup>2</sup> s <sup>-1</sup> ] | $K_H$<br>[M atm <sup>-1</sup> ] |
|--------------------------------|---------------------------------|----------|---------------------------------------------|---------------------------------|
| O <sub>3</sub>                 | 48                              | 0.05     | 0.148                                       | 1.14·10 <sup>-2</sup>           |
| H <sub>2</sub> O <sub>2</sub>  | 34                              | 0.1      | 0.118                                       | 1.02·10 <sup>5</sup>            |
| OH                             | 17                              | 0.05     | 0.153                                       | 25                              |
| HO <sub>2</sub>                | 33                              | 0.05     | 0.104                                       | 9·10 <sup>3</sup>               |
| HCHO                           | 30                              | 0.02     | 0.164                                       | 4.99·10 <sup>3</sup>            |
| CH <sub>3</sub> O <sub>2</sub> | 47                              | 0.0038   | 0.135                                       | 310                             |
| CH <sub>3</sub> OOH            | 48                              | 0.0038   | 0.135                                       | 310                             |
| HNO <sub>3</sub>               | 63                              | 0.054    | 0.132                                       | 2.1·10 <sup>5</sup>             |
| N <sub>2</sub> O <sub>5</sub>  | 108                             | 0.0037   | 0.110                                       | 1.4                             |
| SO <sub>2</sub>                | 64                              | 0.035    | 0.128                                       | 1.23                            |
| HCOOH                          | 46                              | 0.012    | 0.153                                       | 5530                            |
| (CHO) <sub>2</sub>             | 58                              | 0.023    | 0.115                                       | 4.19·10 <sup>5</sup>            |
| CH <sub>3</sub> COCHO          | 72                              | 0.1      | 0.115                                       | 3.2·10 <sup>4</sup>             |
| NH <sub>3</sub>                | 17                              | 0.1      | 0.1                                         | 60.7                            |
| CH <sub>3</sub> COOH           | 60                              | 0.1      | 0.1                                         | 5500                            |

**Table S4.** Gas phase formation and loss processes of formic and acetic acids. The full gas phase mechanism is the same as used in Barth et al. (2021).

|     | Reactants                                           |   | Products                                                                                                                                                                                                                     | k [cm <sup>3</sup> s <sup>-1</sup> ] | E <sub>a</sub> /R [K] |
|-----|-----------------------------------------------------|---|------------------------------------------------------------------------------------------------------------------------------------------------------------------------------------------------------------------------------|--------------------------------------|-----------------------|
| Rg1 | Isoprene + O <sub>3</sub>                           | → | 0.2 CH <sub>3</sub> COOH + 0.1 OH + 0.27 HO <sub>2</sub> +<br>0.06 HO <sub>2</sub> + 0.6 HCHO + CH <sub>3</sub> COOH +<br>0.4 MACR + 0.3 MVK + 0.07 C <sub>3</sub> H <sub>6</sub> +<br>0.2 CH <sub>3</sub> (O)O <sub>2</sub> | 9.6·10 <sup>-18</sup>                |                       |
| Rg2 | CH <sub>3</sub> (O)O <sub>2</sub> + HO <sub>2</sub> | → | 0.1 O <sub>3</sub> + 0.7 CH <sub>3</sub> C(O)OOH + 0.3<br>CH <sub>3</sub> COOH                                                                                                                                               | 1.8·10 <sup>-11</sup>                | 360                   |
| Rg3 | HCOOH + OH                                          | → | CO <sub>2</sub> + H <sub>2</sub> O + HO <sub>2</sub>                                                                                                                                                                         | 1.5· 10 <sup>-12</sup>               |                       |
| Rg4 | CH <sub>3</sub> COOH + OH                           | → | 0.7 OH + 0.7 CH <sub>3</sub> CHO + 0.3 C <sub>2</sub> H <sub>5</sub> O <sub>2</sub>                                                                                                                                          | 1·10 <sup>-11</sup>                  | 200                   |

**Table S5.** Initial mixing ratios of gas phase species [ppb] and concentrations of aqueous phase species [ $\mu\text{g m}_{air}^{-3}$ ]; all other species are not initialized

| Gas phase species             | Mixing ratio [ppb]                  |
|-------------------------------|-------------------------------------|
| O <sub>3</sub>                | 60                                  |
| H <sub>2</sub> O <sub>2</sub> | 1                                   |
| HCHO                          | 0.1                                 |
| HCOOH                         | 0.5                                 |
| CH <sub>3</sub> COOH          | 0.2                                 |
| HNO <sub>3</sub>              | 1                                   |
| SO <sub>2</sub>               | 2                                   |
| NH <sub>3</sub>               | 1                                   |
| NO                            | 3                                   |
| NO <sub>2</sub>               | 0.1                                 |
| CO                            | 150                                 |
| Isoprene                      | 1                                   |
| Toluene                       | 2                                   |
| Ethylene                      | 0.5                                 |
| CH <sub>4</sub>               | 1850 (const.)                       |
| Aqueous phase species         | Concentration                       |
| WSOC                          | 20 $\mu\text{M}$                    |
| Bacteria cells                | 0.1 cm <sub>air</sub> <sup>-3</sup> |

**Table S6.** Rates for all processes shown in Figure 6, at the end of 1-hour simulation time and for  $D_d = 20 \mu\text{m}$ . The upper part of the table lists the rates in units of  $10^{-16} \text{ mol g}_{\text{air}}^{-1} \text{ s}^{-1}$ . These numbers allow the comparison of rates related scaled by the aqueous phase volumes. The bottom part of the table reports the same rates (only aqueous phase) in units of  $10^{-9} \text{ mol L}_{\text{aq}}^{-1} \text{ s}^{-1}$ . These units allow comparing the two droplet classes. If the chemical composition were identical in both classes, the rates should be identical, too. Any deviation is caused by the biodegradation in drop class 2.

| Acid                                                    | pH  | $PT_1$ | $S_{aq1}$ | $L_{aq1}$            | $PT_2$ | $S_{aq2}$ | $L_{aq2}$            | $L_{Bact}$ | $S_g$ | $L_g$  |
|---------------------------------------------------------|-----|--------|-----------|----------------------|--------|-----------|----------------------|------------|-------|--------|
|                                                         |     |        |           |                      |        |           |                      |            |       |        |
| Formic acid                                             | 3   | -2.5   | 2.9       | -0.45                | 0.87   | 0.003     | $-4 \cdot 10^{-4}$   | -0.87      | 0     | -0.77  |
|                                                         | 4.6 | 3.7    | 5.3       | 14                   | 2.0    | 0.006     | -0.011               | -2.0       | 0     | -0.22  |
|                                                         | 5.6 | 1.2    | 11        | 27                   | 0.49   | 0.013     | -0.008               | -0.5       | 0     | -0.015 |
| Acetic acid                                             | 3   | -3.0   | 3.1       | -0.004               | 0.15   | 0.003     | $-3.5 \cdot 10^{-6}$ | -0.15      | 0.38  | -6.4   |
|                                                         | 4.6 | -8.2   | 8.9       | -0.05                | 0.31   | 0.009     | $-5 \cdot 10^{-5}$   | -0.32      | 0.85  | -5.4   |
|                                                         | 5.6 | -10    | 16        | -0.74                | 0.98   | 0.02      | $-7 \cdot 10^{-4}$   | -1.0       | 1.1   | -3.4   |
| $10^{-9} \text{ mol L}_{\text{aq}}^{-1} \text{ s}^{-1}$ |     |        |           |                      |        |           |                      |            |       |        |
| Formic acid                                             | 3   | -0.61  | 0.72      | -0.11                | 210    | 0.72      | -0.11                | -210       |       |        |
|                                                         | 4.6 | 0.91   | 1.3       | -3.5                 | 500    | 1.4       | -2.8                 | -500       |       |        |
|                                                         | 5.6 | 0.3    | 2.8       | -6.6                 | 120    | 3.1       | -2.0                 | -120       |       |        |
| Acetic acid                                             | 3   | -0.74  | 0.76      | $-8.7 \cdot 10^{-4}$ | 37     | 0.76      | $-8.5 \cdot 10^{-4}$ | -38        |       |        |
|                                                         | 4.6 | -2.0   | 2.2       | -0.012               | 77     | 2.2       | -0.012               | -79        |       |        |
|                                                         | 5.6 | -2.5   | 4.0       | -0.18                | 240    | 4.6       | -0.17                | -250       |       |        |

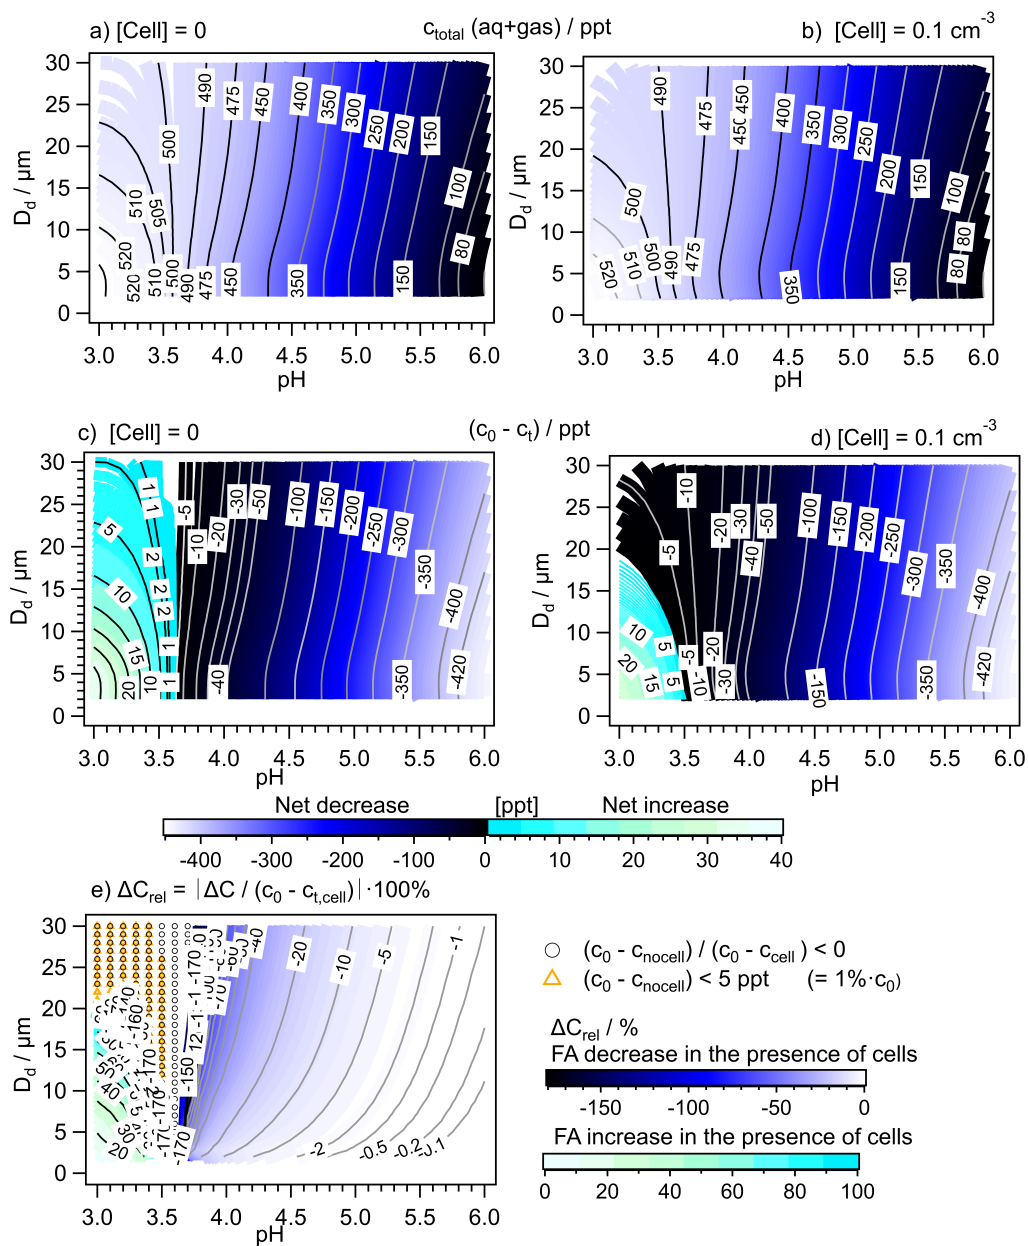

**Figure S1.** Results from 900 1-hour simulations (30 pH values, 30 drop diameters, Total formic acid concentrations (gas + aqueous) and absolute concentration difference  $(c_0 - c_t)$  in the absence of bacteria (a, c) and in the presence of bacteria (b, d). e) Relative difference in concentration due to bacteria according to Equation 6. The threshold of  $c_0 - c_{t,\text{nocell}}$  in panel e) is chosen to avoid displaying very high values by dividing by an irrelevant small concentration difference

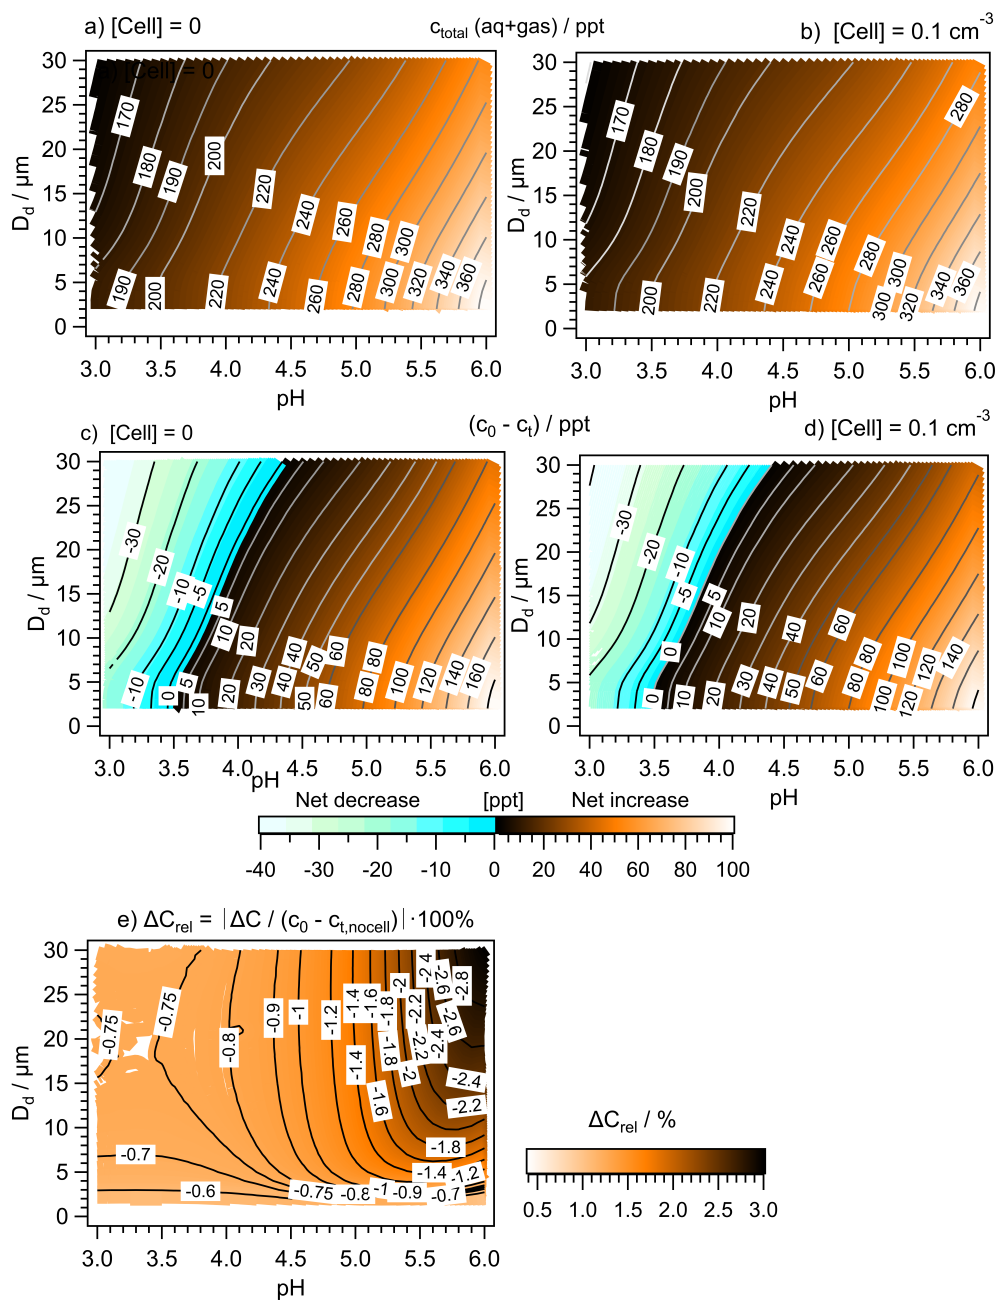

**Figure S2.** Results from 900 1-hour simulations (30 pH values, 30 drop diameters, Total acetic acid concentrations (gas + aqueous) and absolute concentration difference ( $(c_0 - c_t)$ ) in the absence of bacteria (a, c) and in the presence of bacteria (b, d). e) Relative difference in concentration due to bacteria according to Equation 6

## References

- Barth, M. C., Ervens, B., Herrmann, H., Tilgner, A., McNeill, V. F., Tsui, W. G., Deguillaume, L., Chaumerliac, N., Carlton, A. G., and Lance, S.: Box Model Intercomparison of Cloud Chemistry, *Journal of Geophysical Research Atmospheres*, 126, e2021JD035486, <https://doi.org/10.1029/2021JD035486>, 2021.
- 5 Brimblecombe, P. and Clegg, S. L.: The Solubility and Behaviour of Acid Gases in the Marine Aerosol, *J. Atmos. Chem.*, 7, 1–18, 1988.
- Khaled, A., Zhang, M., Amato, P., Delort, A.-M., and Ervens, B.: Biodegradation by bacteria in clouds: an underestimated sink for some organics in the atmospheric multiphase system, *Atmospheric Chemistry and Physics*, 21, 3123–3141, <https://doi.org/10.5194/acp-21-3123-2021>, 2021.
- 10 Väitilingom, M., Charbouillot, T., Deguillaume, L., Maisonnobe, R., Parazols, M., Amato, P., Sancelme, M., and Delort, A.-M.: Atmospheric chemistry of carboxylic acids: microbial implication versus photochemistry, *Atmospheric Chemistry and Physics*, 11, 8721–8733, <https://doi.org/10.5194/acp-11-8721-2011>, 2011.
